# Supplementary material
Source: publisher figshare collection journal article supplement (https://sage.figshare.com/ndownloader/files/18725096)
Supplement: Supplementary file 1 [file 18725096]

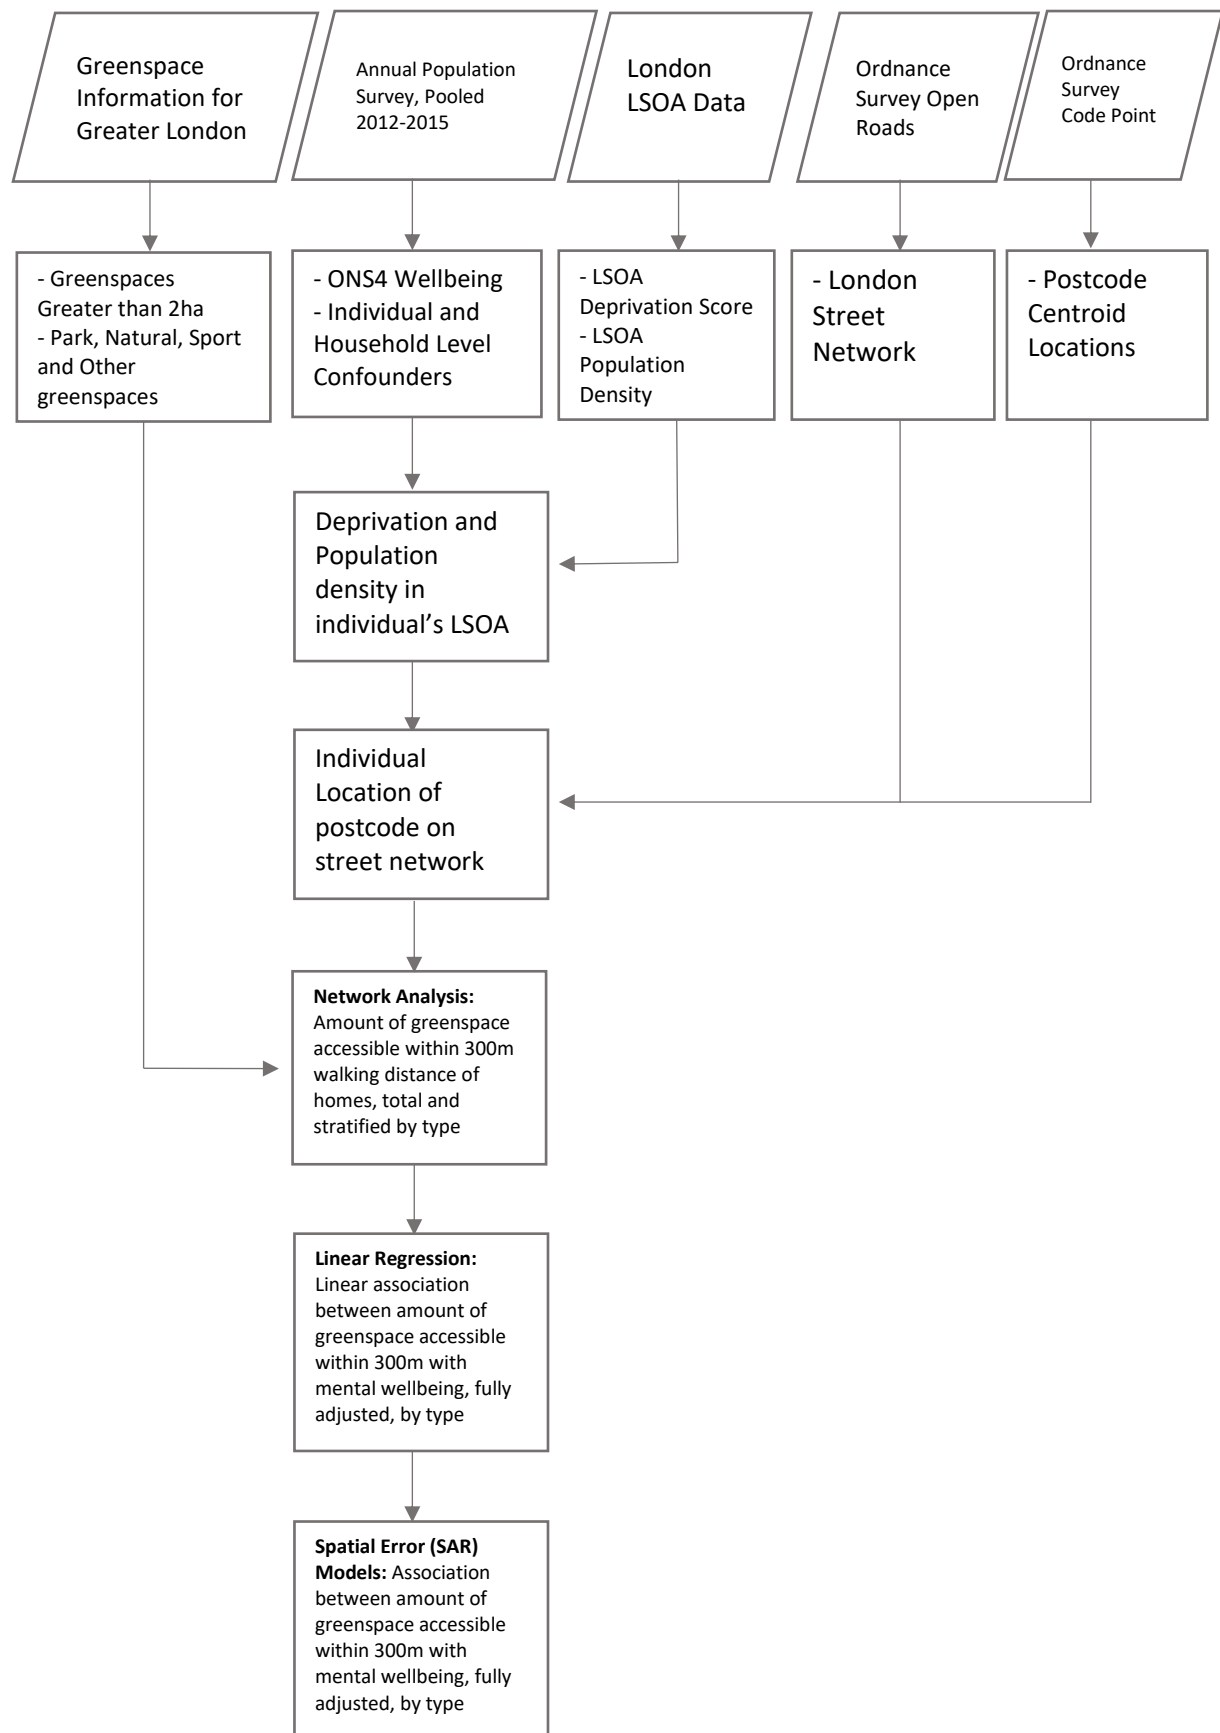

Figure 1 Data flow to final sample and analysis

**Autocorrelations: Life Satisfaction and Area of Greenspace, by Type**

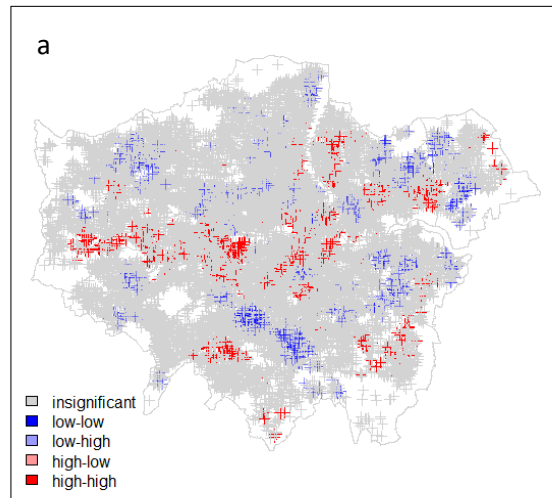

**Autocorrelations: Worth and Area of Greenspace, by Type**

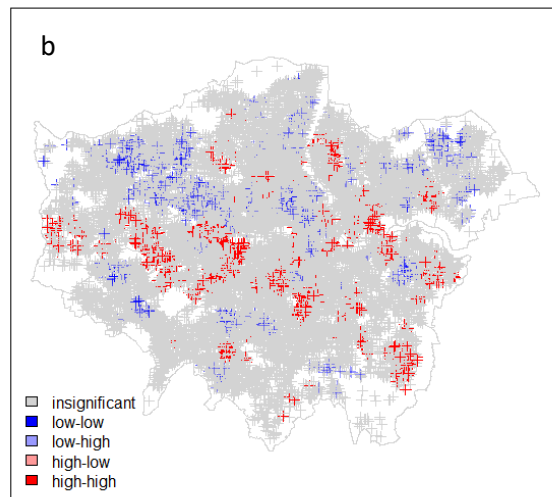

**Autocorrelations: Happiness and Area of Greenspace, by Type**

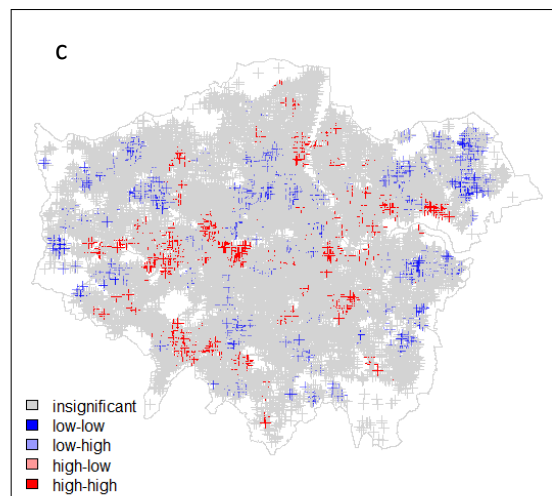

*Figure 2a-c LISA cluster map of residuals of OLS regression models, adjusted for greenspace type*

**Autocorrelations: Life Satisfaction and Area of Greenspace, by Type**

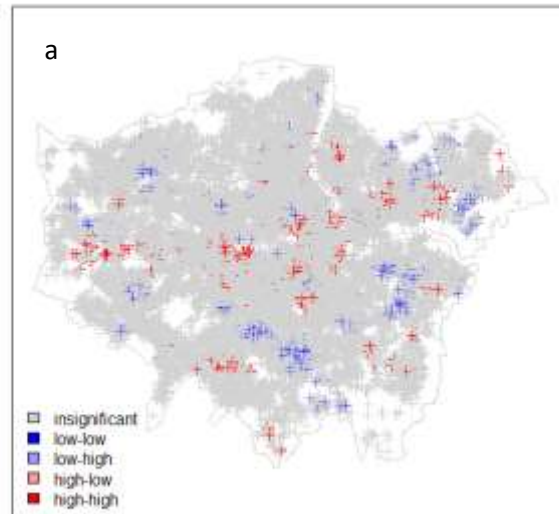

**Autocorrelations: Worth and Area of Greenspace, by Type**

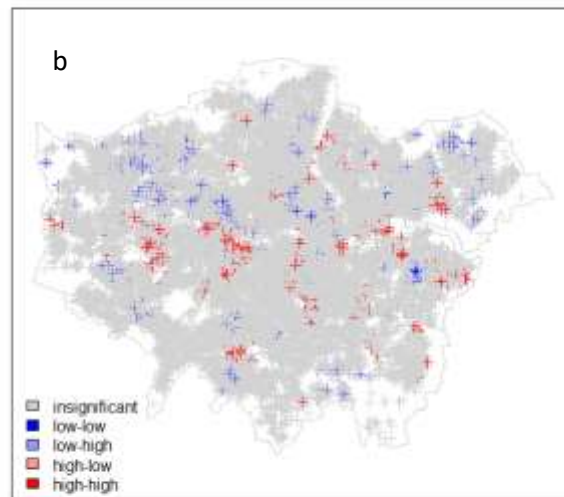

**Autocorrelations: Happiness and Area of Greenspace, by Type**

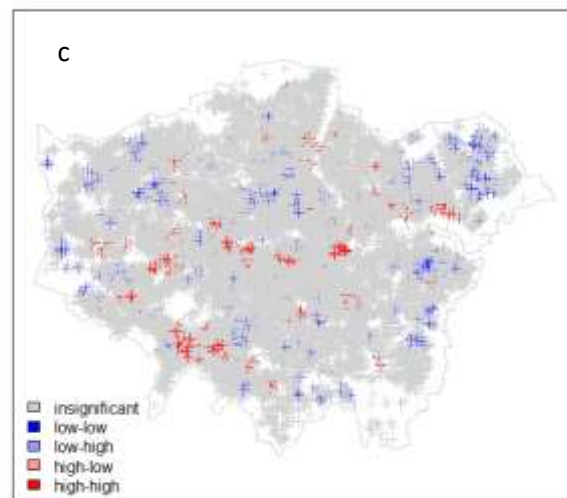

*Figure 3a-c LISA cluster map of residuals of SE regression models*

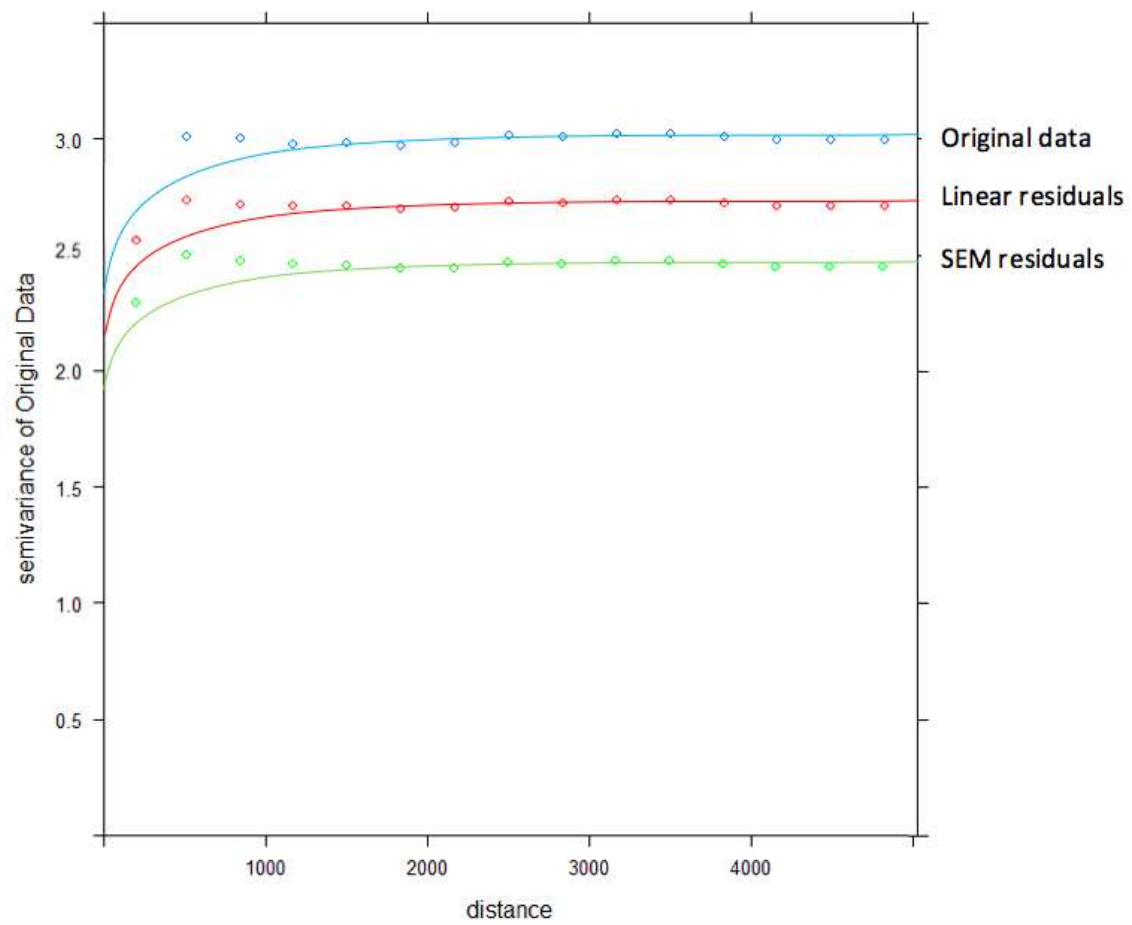

Figure 4 Semi-variogram displaying the semivariance over distance of the original data and fitted models

| <i>PPG17 type</i>                                                                                                                                                                 | <i>Study name</i>     | <i>Description and aggregation of sub-categories, taken from GiGL (Greenspace Information for Greater London CIC, 2017; Planning Policy Guidance, 2002)</i>                                                                                                                                                                                                                                                                                                                                                                                                                                     |
|-----------------------------------------------------------------------------------------------------------------------------------------------------------------------------------|-----------------------|-------------------------------------------------------------------------------------------------------------------------------------------------------------------------------------------------------------------------------------------------------------------------------------------------------------------------------------------------------------------------------------------------------------------------------------------------------------------------------------------------------------------------------------------------------------------------------------------------|
| Parks and Gardens                                                                                                                                                                 | Parks                 | <p><b>Park:</b> public open space laid out formally for leisure and recreation.</p> <p><b>Formal garden</b> refers to spaces with well-defined boundaries that display high standards of horticulture with intricate and detailed landscaping.</p>                                                                                                                                                                                                                                                                                                                                              |
| Natural and Semi-natural<br>Urban Greenspace                                                                                                                                      | Natural<br>greenspace | <p><b>Common:</b> publically accessible open spaces with few if any facilities. They will typically be mainly rough open grass/woodland, less formal than parks.</p> <p><b>Country Parks:</b> large areas set aside for informal recreation near or within towns and cities.</p> <p><b>Public woodland:</b> woodland accessible for recreational use, but not managed for nature conservation.</p> <p><b>Nature reserve:</b> open space that is managed primarily for nature conservation.</p>                                                                                                  |
| Outdoor Sports Facilities                                                                                                                                                         | Sports                | <p><b>Recreation ground:</b> mown grass used primarily for informal, unorganised ball games and similar activities.</p> <p><b>Playing fields:</b> pitches, usually for football, but also for rugby and hockey, and in summer, for cricket.</p> <p><b>Golf course:</b> landscaped area for playing golf, often with other facilities.</p> <p><b>Other recreational:</b> sites used exclusively or predominantly for other organised sports such as bowls or tennis.</p>                                                                                                                         |
| Green Corridors, Amenity, spaces for Children and Teenagers, Allotments and Community Gardens and City Farms, Cemeteries and Churchyards, Other Urban Fringe, Civic Spaces, Other | Other                 | <p><b>Includes:</b> rivers, canals, railway cuttings and embankments, disused railway track bed, road island verge, walking/cycle route, amenity greenspace, village green, hospital grounds, educational grounds, landscaping around premises, reservoirs, play space, adventure playground, youth area, allotments, community garden, city farm, cemeteries, churchyards, equestrian centre, agriculture, nursery, horticulture, civic and market squares, other hard surfaced areas, sewerage and water works, disused quarries, gravel pits, vacant land, land reclamations, airfields.</p> |

*Table 1 Greenspace type classification*

*Life Satisfaction*

| <i>Variable</i>    | <i>Value</i>       | <i>B</i> | <i>SE</i> | <i>p</i> |
|--------------------|--------------------|----------|-----------|----------|
| Area of Greenspace | Other, ref         |          |           |          |
|                    | Natural            | 0.028    | 0.008     | <0.001   |
|                    | Parks              | -0.002   | 0.006     | 0.794    |
|                    | Sports             | 0.006    | 0.006     | 0.281    |
| Age                | 16-24 ,ref         |          |           |          |
|                    | 25-34              | -0.245   | 0.049     | <0.001   |
|                    | 35-44              | -0.425   | 0.049     | <0.001   |
|                    | 45-54              | -0.582   | 0.050     | <0.001   |
|                    | 55-64              | -0.194   | 0.053     | <0.001   |
|                    | 65-74              | 0.214    | 0.056     | <0.001   |
|                    | over 75            | 0.300    | 0.061     | <0.001   |
| Sex                | Female             | 0.078    | 0.022     | <0.001   |
| Married/Cohabiting | Yes                | 0.489    | 0.023     | <0.001   |
| Ethnicity          | White British, ref |          |           |          |
|                    | Black              | -0.173   | 0.036     | <0.001   |
|                    | South Asian        | 0.178    | 0.037     | <0.001   |
|                    | Other Asian        | 0.049    | 0.055     | 0.375    |
|                    | Mixed              | -0.069   | 0.078     | 0.377    |
|                    | Other              | 0.074    | 0.047     | 0.117    |
| Health             | Fair, ref          |          |           |          |
|                    | Very Good          | 1.037    | 0.033     | <0.001   |
|                    | Good               | 0.620    | 0.031     | <0.001   |
|                    | Poor               | -0.886   | 0.054     | <0.001   |
|                    | Very Poor          | -1.921   | 0.092     | <0.001   |
| Qualifications     | Has Degree/Diploma | -0.078   | 0.024     | <0.001   |
| Economic Activity  | Employed, ref      |          |           |          |
|                    | Unemployed         | -0.708   | 0.055     | <0.001   |
|                    | Inactive           | -0.080   | 0.036     | 0.025    |
| Employed Full-Time | Yes                | 0.012    | 0.035     | 0.742    |
| Income, Quintiles  | 1, ref             |          |           |          |
|                    | 2                  | -0.157   | 0.044     | <0.001   |
|                    | 3                  | 0.002    | 0.044     | 0.968    |
|                    | 4                  | 0.116    | 0.046     | 0.011    |
|                    | 5                  | 0.241    | 0.046     | <0.001   |
| Housing Tenure     | Owns Home          | 0.182    | 0.030     | <0.001   |
|                    | Detached, ref      |          |           |          |
|                    | Semi-detached      | -0.010   | 0.071     | 0.893    |
|                    | Terraced           | -0.003   | 0.068     | 0.967    |
|                    | Flat               | -0.073   | 0.068     | 0.282    |
|                    | Other              | -0.092   | 0.066     | 0.160    |
| Population Density |                    | 0.000    | 0.000     | 0.146    |
| Deprivation        |                    | -0.003   | 0.001     | 0.026    |

*Table 2 Results of fully adjusted Spatial Error model for life satisfaction and types of accessible greenspace*

Worth

| Variable           | Value              | B      | SE    | p      |
|--------------------|--------------------|--------|-------|--------|
| Area of Greenspace | Other, ref         |        |       |        |
|                    | Natural            | 0.010  | 0.008 | 0.196  |
|                    | Parks              | 0.004  | 0.006 | 0.555  |
|                    | Sports             | 0.010  | 0.006 | 0.071  |
| Age                | 16-24 ,ref         |        |       |        |
|                    | 25-34              | -0.160 | 0.049 | 0.001  |
|                    | 35-44              | -0.155 | 0.049 | 0.001  |
|                    | 45-54              | -0.284 | 0.050 | <0.001 |
|                    | 55-64              | 0.112  | 0.052 | 0.030  |
|                    | 65-74              | 0.334  | 0.055 | <0.001 |
|                    | over 75            | 0.267  | 0.061 | <0.001 |
| Sex                | Female             | 0.235  | 0.022 | <0.001 |
| Married/Cohabiting | Yes                | 0.341  | 0.022 | <0.001 |
| Ethnicity          | White British, ref |        |       |        |
|                    | Black              | 0.103  | 0.036 | 0.004  |
|                    | South Asian        | 0.131  | 0.037 | <0.001 |
|                    | Other Asian        | 0.000  | 0.054 | 0.999  |
|                    | Mixed              | 0.256  | 0.077 | 0.001  |
|                    | Other              | -0.006 | 0.047 | 0.893  |
| Health             | Fair, ref          |        |       |        |
|                    | Very Good          | 0.803  | 0.033 | <0.001 |
|                    | Good               | 0.417  | 0.030 | <0.001 |
|                    | Poor               | -0.766 | 0.054 | <0.001 |
|                    | Very Poor          | -1.502 | 0.090 | <0.001 |
| Qualifications     | Has Degree/Diploma | -0.044 | 0.024 | 0.067  |
| Economic Activity  | Employed, ref      |        |       |        |
|                    | Unemployed         | -0.554 | 0.054 | <0.001 |
|                    | Inactive           | -0.186 | 0.035 | <0.001 |
| Employed Full-Time | Yes                | -0.080 | 0.035 | 0.022  |
| Income, Quintiles  | 1, ref             |        |       |        |
|                    | 2                  | -0.127 | 0.043 | 0.003  |
|                    | 3                  | 0.019  | 0.043 | 0.662  |
|                    | 4                  | 0.081  | 0.045 | 0.074  |
|                    | 5                  | 0.026  | 0.045 | 0.565  |
| Housing Tenure     | Owns Home          | 0.093  | 0.029 | 0.001  |
|                    | Detached, ref      |        |       |        |
|                    | Semi-detached      | -0.006 | 0.070 | 0.932  |
|                    | Terraced           | -0.025 | 0.067 | 0.704  |
|                    | Flat               | -0.112 | 0.067 | 0.094  |
|                    | Other              | -0.081 | 0.065 | 0.212  |
| Population Density |                    | 0.000  | 0.000 | 0.483  |
| Deprivation        |                    | -0.001 | 0.001 | 0.298  |

Table 3 Results of fully adjusted Spatial Error model for worth and types of accessible greenspace

| <i>Happiness</i>   |                    |          |           |          |
|--------------------|--------------------|----------|-----------|----------|
| <i>Variable</i>    | <i>Value</i>       | <i>B</i> | <i>SE</i> | <i>p</i> |
| Area of Greenspace | Other, ref         |          |           |          |
|                    | Natural            | 0.023    | 0.010     | 0.019    |
|                    | Parks              | -0.009   | 0.007     | 0.210    |
|                    | Sports             | 0.007    | 0.007     | 0.338    |
| Age                | 16-24 ,ref         |          |           |          |
|                    | 25-34              | -0.125   | 0.060     | 0.037    |
|                    | 35-44              | -0.131   | 0.060     | 0.029    |
|                    | 45-54              | -0.190   | 0.061     | 0.002    |
|                    | 55-64              | 0.088    | 0.064     | 0.166    |
|                    | 65-74              | 0.475    | 0.068     | <0.001   |
|                    | over 75            | 0.487    | 0.075     | <0.001   |
| Sex                | Female             | 0.025    | 0.027     | 0.358    |
| Married/Cohabiting | Yes                | 0.356    | 0.028     | <0.001   |
| Ethnicity          | White British, ref |          |           |          |
|                    | Black              | 0.117    | 0.044     | 0.008    |
|                    | South Asian        | 0.300    | 0.045     | <0.001   |
|                    | Other Asian        | -0.002   | 0.067     | 0.971    |
|                    | Mixed              | 0.075    | 0.095     | 0.432    |
|                    | Other              | 0.006    | 0.058     | 0.910    |
| Health             | Fair, ref          |          |           |          |
|                    | Very Good          | 1.085    | 0.040     | <0.001   |
|                    | Good               | 0.595    | 0.037     | <0.001   |
|                    | Poor               | -0.997   | 0.066     | <0.001   |
|                    | Very Poor          | -1.719   | 0.111     | <0.001   |
| Qualifications     | Has Degree/Diploma | -0.059   | 0.030     | 0.046    |
| Economic Activity  | Employed, ref      |          |           |          |
|                    | Unemployed         | -0.552   | 0.067     | <0.001   |
|                    | Inactive           | -0.067   | 0.043     | 0.124    |
| Employed Full-Time | Yes                | -0.048   | 0.043     | 0.257    |
| Income, Quintiles  | 1, ref             |          |           |          |
|                    | 2                  | -0.093   | 0.053     | 0.080    |
|                    | 3                  | -0.010   | 0.053     | 0.859    |
|                    | 4                  | -0.061   | 0.056     | 0.274    |
|                    | 5                  | -0.035   | 0.056     | 0.528    |
| Housing Tenure     | Owns Home          | 0.090    | 0.036     | 0.012    |
|                    | Detached, ref      |          |           |          |
|                    | Semi-detached      | 0.005    | 0.086     | 0.956    |
|                    | Terraced           | 0.040    | 0.082     | 0.630    |
|                    | Flat               | 0.008    | 0.082     | 0.919    |
|                    | Other              | 0.006    | 0.080     | 0.944    |
| Population Density |                    | 0.000    | 0.000     | 0.232    |
| Deprivation        |                    | -0.002   | 0.001     | 0.074    |

*Table 4 Results of fully adjusted Spatial Error model for happiness and types of accessible greenspace*
